# 1 **Comparative analysis of the Accelerated Aged seed transcriptome** 2 **profiles of maize CSSLs (I178 and X178)**

3

4 Li Li<sup>1</sup>, Feng Wang<sup>1</sup>, Xuhui Li<sup>1</sup>, Yixuan Peng<sup>1</sup>, Hongwei Zhang<sup>2</sup>, Stefan Hey<sup>3</sup>, Guoying Wang<sup>2</sup>,  
5 Jianhua Wang<sup>1\*</sup>, Riliang Gu<sup>1\*</sup>

6

7 <sup>1</sup> Seed Science and Technology Research Center, Beijing Innovation Center for Seed Technology  
8 (MOA), Beijing Key Laboratory for Crop Genetic Improvement, College of Agronomy and  
9 Biotechnology, China Agricultural University, Beijing 100193, China.

10 <sup>2</sup> Institute of Crop Sciences, Chinese Academy of Agricultural Sciences, Beijing 100081, China

11 <sup>3</sup> Department of Agronomy, Iowa State University, Ames, Iowa 50011-1085, United States of  
12 America.

13 \*Correspondence: Jianhua Wang (Email: [wangjh63@cau.edu.cn](mailto:wangjh63@cau.edu.cn)) and Riliang Gu (Email:  
14 [riliangu@cau.edu.cn](mailto:riliangu@cau.edu.cn); Tel: 86-10-62733853)

15

16 Running title: RNA-Seq analysis of I178 and X178

17

## 18 **Abstract:**

19 Seed longevity is one of the most essential characters of seed quality. Two Chromosome segment  
20 substitution lines (CSSL) I178 and X178 with significant difference on seed longevity were  
21 subjected to transcriptome sequencing before (0d-AA) and after five days of accelerated ageing  
22 (5d-AA) treatments. Compared to the non-accelerated ageing treatment (0d-AA), 286 and 220  
23 differential expressed genes (DEGs) were identified in I178 and X178, respectively. Among those,  
24 98 DEGs were detected in both I178 and X178 after 5d-AA, Enriched GO terms included cellular  
25 components of cell part, intracellular part, organelle and membrane etc., including carbohydrate  
26 derivative catabolic process, carbohydrate synthesis, sugar isomerase (SIS) family protein etc.

27 Transcriptome analysis of I178 and X178 showed that Alternative splicing (AS) occurs in 63.6%  
28 of the expressed genes in all samples. Only 381 genes specifically occurred AS in I178 and X178  
29 after 5d-AA, mostly enriched in nucleotide and nucleoside binding. Combined with the reported  
30 QTL mapping result, the DEG and the AS information, 13 DEGs in the mapping intervals and 7  
31 AS-DEGs were potential candidates may directly or indirectly associated to seed ageing.

32

33 **Keywords:** Seeds longevity, Chromosome Segment Substitution Lines (CSSL), Transcriptome  
34 sequencing, Accelerated Ageing, Alternative Splicing, qRT-PCR

35

## 36 **1. Introduction**

37 Ageing is an inevitable process affecting seed longevity, the length of time a seed remains viable,  
38 which is accompanied with a progressive loss of quality or viability over time, and a crucial issue  
39 for germplasm conservation and seed marketing [1]. Seed longevity depends greatly on seed  
40 moisture, relative humidity, oxygen pressure and temperature of storage [2, 3]. Seed storability is  
41 a complex trait, many studies have illustrated the oxidative and mitochondrial damage occurs  
42 during seed storage, which are the reasons for loss of longevity, and. During seed storage, the  
43 activity of the ascorbate and glutathione (AsA-GSH) cycle is reduced resulting in ROS  
44 accumulation [4, 5], and carbonylation happened of the proteins in seeds [6, 7]. These play  
45 important roles in scavenging reactive oxygen species (ROS). High concentration of H<sub>2</sub>O<sub>2</sub> and the  
46 malondialdehyde (MDA), end-products of lipid peroxidation, were considered as the critical factor  
47 in contributing to seed deterioration and influencing seed longevity and vigor [8-11]. Moreover,  
48 the activity of mitochondria, the organelles that supply energy for seed germination, is

49 significantly decreased during storage, thereby inhibiting seed germination [5, 12]. Thus, the level  
50 of antioxidants and the level of energy supply are key factors in the regulation of seed longevity.  
51 The genetic architecture of crop seed longevity is still far behind the model plant Arabidopsis.  
52 Recently, various omic approaches have been used to investigate protein expression patterns  
53 during seed storage [13, 3, 14, 15, 7, 16]. Sano et al performed an RNA-seq experiment on bulked  
54 RILs of Est-1 × Col-0 in Arabidopsis and found that brassinosteroid is important for seed  
55 longevity by regulating the seed coat permeability by BR signaling pathway [13]. Lv et al  
56 conducted proteomic analysis on artificially aged wheat seeds; differentially expressed proteins  
57 (DEPs) were mainly involved in metabolism, energy supply, and defense/stress responses.  
58 Up-regulated proteins were mainly enriched in ribosome, whereas the down-regulated proteins  
59 were mainly accumulated in energy supply, starch and sucrose metabolism and stress defense  
60 (ascorbate and aldarate metabolism), revealed that the inability to protect against ageing leads to  
61 the incremental decomposition of the stored substance, impairment of metabolism and energy  
62 supply, and ultimately resulted in seed deterioration [14]. Yin et al performed proteomic analysis  
63 on rice embryo with different days of ageing, by comparison analysis, they found most of down  
64 regulated proteins were related to energy metabolism (29%), defense (21%), glycolytic pathway  
65 (8%), protein synthesis (8%), protein destination and storage (6%), transcription (5%), growth or  
66 division (4%), secondary metabolism (3%), transporting (1%), signal transduction (1%). While  
67 most of the upregulated proteins were related to storage, energy, disease and defense, metabolism,  
68 protein synthesis, growth and division [7]. Chen et al compared the storage ability of two wheat  
69 varieties (storage tolerant vs. storage sensitive), most of the proteins remarkably different from  
70 two varieties were mainly associated with disease or defense, protein destination and storage,

71 energy, also the storage tolerant seeds possessed a stronger ability in activating the defense system  
72 against oxidative damage, utilizing storage proteins for germination, and maintaining energy  
73 metabolism for ATP supply [16]. While seed longevity is different between species, it also differs  
74 between genotypes of a species, the genetic information that involving in seed longevity was far  
75 beyond the understood. Also the expression of genes and proteins related to disease defense and  
76 energy is largely altered during seed storage. However, the effect of such changes on ageing  
77 tolerance and sensitivity of seeds is largely unknown.

78

79 In the present study, the simulation of natural seed deterioration by artificial accelerated ageing  
80 (AA) treatment by controlled the moisture up to 95% and the relative temperature at 45 °C. Two  
81 chromosome segment substitution lines (CSSL) (X178 and improved 178, I178), with similar  
82 genetic background but shows different sensitivity or endurance in terms of ageing process, were  
83 subjected the transcriptional expression analysis, differential expressed genes (DEGs) of  
84 non-accelerated ageing treated dry seeds (0d-AA) and 5 days accelerated ageing treatment  
85 (5d-AA) in two 178 lines were detected and the co-DEGs as well as the genotype-specific DEGs  
86 were subjected qRT-PCR validation, followed by alternative splicing analysis to discover genes or  
87 pathways that affected during seeds ageing. We were aiming for uncovering ageing related genes  
88 by DEG, alternative splicing (AS) and the candidate gene analysis which existed in QTL mapping  
89 interval. Consequently, exploring more biology process that been affected by ageing or those  
90 processes that influencing the ageing.

91

92 **2. Materials and Methods** Maternal parent X178 was a widely cultivated maize hybrid

93 Nongda108 (released by China Agricultural University in 2001), an elite line which has better  
94 agronomic trait of storability. I178 (Improved X178) was derive from X178 by introgression of  
95 chromosome segments for several generations (CSSL), followed by consecutive self-crossing for  
96 at least 10 generations.

#### 97 **Accelerated ageing treatment (AA)**

98 The simultaneously fresh harvested (FH) I178 and X178 seeds were surface disinfected with 1%  
99 NaClO for 5 min and washed 10 times with sterile-distilled water, balancing the moisture in the  
100 room temperature for overnight, followed by accelerated aging treatment of suspending the seeds  
101 on metal mesh trays within closed metal boxes (25× 25×14 cm), maintained in an ageing chamber  
102 (LHC-150-11, Beijing Luxi Ltd) at the condition of 95% moisture content and 50 °C temperature  
103 for 3, 5 and 7 days of different purpose, 3 replications and non-accelerated aged (0d-AA) seeds as  
104 the control. The storage condition of harvested seeds was under 10 °C in a cold room.

#### 105 **Protein Quantification and Zein analysis**

106 Samples of I178 and X178 were prepared for zein extraction, including: 1). dry seeds; 2). seeds  
107 after 6 hours imbibed water (0d-6h); 3). Seeds germinated 48 hours (0d-48h); 4). seeds after  
108 3d-AA; 5). Seeds after 5d-AA; 6). seeds after 7d-AA were prepared as following methods: dry  
109 seeds without any treatment, imbibed into water for 6 hours, 48 hours seeds germination was  
110 performed with pre-wetted crepe cellulose papers (CCP), and covered with another piece of CCP,  
111 rolling into paper rolls and upright in the ziplock bags for 48 hours under 25 °C. Above samples  
112 were powdered in liquid N<sub>2</sub> and 50 mg of powder was used for zein extraction. Removing the  
113 lipids with petroleum benzin and dissolving the samples with protein extraction buffer (12.5 mM  
114 sodium borate, 2% 2-mercaptoethanol, 1% SDS and pH10), followed by 5 min incubation at

115 37 °C, centrifuged at 14,800 rpm for 15 minutes, the supernatant contains total protein was  
116 incubated with absolute ethyl alcohol for 2 hours. After centrifugation at 14,800 rpm for 15  
117 minutes, the supernatant contains zein was dissolved in IPG solution (8 M urea, 220 mM DTT and  
118 2% CHAPS) and measured with the BCA protein assay kit (TRANS, Beijing).

#### 119 **Tetrazolium chloride (TTC) staining**

120 By refer to the Tetrazolium staining method (TZ) on soybean (*Glycine max.*) vigor test [48], corn  
121 seeds were imbibed with water for 20 hours at room temperature prior to staining, cut the seeds  
122 longitudinally through embryo, then staining with 0.1% Tetrazolium chloride solution (TTC,  
123 aqueous solution of 2,3,5-triphenyl tetrazolium chloride) for 1 h and washing 3 times before  
124 observation.

#### 125 **RNA-seq and qRT-PCR**

126 For RNA-Seq experiment, 100 artificial accelerated aged seeds (5d-AA) were pooled and grinding  
127 promptly in liquid nitrogen, 0.1 g of powder was used for isolating the mRNA with the RNAprep  
128 pure Plant Kit (Cat#DP432, TIANGEN, Beijing), RNA was quality check the total RNA with the  
129 2% agrose gel, high quality RNA was used for RNA-Seq library preparation and sequenced on a  
130 Illumina HiSeq2500 platform (Berry Genmics, Beijing). Two biological replications included and  
131 the Non-accelerated aged dry seeds (0d-AA) as the control.

132

133 RNA for qRT-PCR experiment was extracted as above procedure, Quality checking the RNA and  
134 performed the reverse transcription with the OneScript cDNA Synthesis Kit (Cat#G234, ABM,  
135 Canada), primer of the genes was designed with software Primer Premier5.0. The Fast Sybr Green  
136 Master Mix (Applied Biosystems, Foster City, CA, USA) was employed, according to the

137 manufacturer's instructions, in a reaction volume of 10  $\mu$ l. qRT-PCR was conducted on a ABI  
138 Quantstudio™ DX Real-Time PCR system (Applied Biosystems). PCR conditions included initial  
139 denaturation for 2 min at 95 °C, followed by 40 cycles of denaturation at 95 °C for 30 s,  
140 hybridization at 60 °C for 40 s, and elongation at 68 °C for 10 s. The actin2 gene was used as an  
141 internal control. The  $2^{-\Delta\Delta ct}$  method was used to calculate the relative level of gene expression, and  
142 the B73 sample served as a control. A relative level of gene expression greater than 1 was  
143 considered to indicate up-regulation, and less than 1 indicated down-regulation. All qRT-PCR  
144 reactions were performed with the three biological replicates.

#### 145 **Data analysis**

146 For gene expression level in I178 and X178, transcription with FPKM (Fragments per Kilo bases  
147 per Million fragments mapped) >0.1 was considered as expressed genes calculated by htseq-count  
148 in HTSeq software. To identify genes involving in seeds ageing, the comparison of genes  
149 expressed after 0d-AA and 5d-AA was performed in both I178 and X178, DESeq2 was used for  
150 differential expression analysis with the Fold Change of 1.5, with adjusted P-value (*q-value*)  
151 <0.05 as the threshold value. Venn diagram was performed with online software  
152 (<http://bioinfogp.cnb.csic.es/tools/venny/index.html>) [49]. Agri-Go enrichment was also  
153 performed with online (Agri GO v2.0; <http://systemsbiology.cau.edu.cn/agriGOv2/#>) database  
154 [50]. Gene Organ or tissue specific expression level was compared with online q-teller database  
155 (<http://www.qteller.com/qteller4/>).

156

### 157 **3. Results**

#### 158 **3.1 Comparison of seeds storability for I178 and X178**

159 Few morphological and the physical differences were observed between X178 and I178 because  
160 of the similar genetic background. Seed storability can be reflected by color of seed coat, seed  
161 viability and vigor after long term storage or AA treatment. Seed coat of I178 was obviously  
162 oxidized after 5d-AA as the brown color, and the seed viability was reduced dramatically in I178  
163 based on triphenyl tetrazolium chloride (TTC) staining, fresh harvested (FH) seeds have highest  
164 viability and dehydrogenase activity as the embryo part stained with bright-color while  
165 light-colored after 3d-AA and especially no color after 5d-AA (**Fig 1A, B**). FH seeds of two lines  
166 showed slight difference of relative conductivity (RC) before 3d-AA, significant difference  
167 observed after 5d-AA. After 1-year storage, the RC of I178 was two times higher than X178, as  
168 the continued AA treatment, the storability was reduced significantly in I178 after 5d-AA (**Fig**  
169 **1C**). Comparative SDS-PAGE analysis of seed storage protein (SSP) zein in dry seeds, imbibed  
170 seeds (6 hours imbibition), germinated seeds (48 hours germination) and 3, 5 and 7 days  
171 accelerated aged seeds (3d-AA, 5d-AA and 7d-AA), and no significant difference was observed  
172 between two 178 lines after AA treatment except the degradation of 40 kD protein happened in  
173 I178 after 5d-AA, after 7d-AA, the proteins smaller than 25 kD (including  $\gamma$ 27,  $\alpha$ 22,  $\alpha$ 19,  $\gamma$ 16,  $\beta$ 15  
174 and  $\delta$ 10) were also dramatically degraded in I178 (**Fig 1D**).

175

### 176 **3.2 Transcriptome profile of I178 and X178 seeds**

177 The cDNA libraries of the non-accelerated aged dry seeds (0d-AA), 5 days of accelerated aged  
178 seeds (5d-AA) for I178 and X178 were prepared and sequenced using an Illumina HiSeq 2500  
179 platform, 8 Gb data of two biological replicates for each sample were obtained. Reads of low  
180 sequencing quality were filtered out (about 0.12%~0.18%), and totally 34.4~43.4 million 100 bp



181 paired-end reads were generated in I178 and X178, with the average of 40.8 million reads in each  
182 sample. At least 97.22% high quality reads used for analysis. Of these reads, average 68.8%  
183 unique mapped reads (289.9 million) were aligned to the B73 reference genome to estimate the  
184 transcript levels (ZmB73\_RefGen\_v3). Expression values were calculated with units of fragments  
185 per kilo-base per million reads mapped (FPKM). As expected, 92.92% high quality reads can be  
186 mapped to protein-coding genes, 1.36% and 5.72% were mapped to intron and intergenic region,  
187 respectively (**Table S1**).

188

### 189 **3.3 Identification of the DEGs in I178 and X178**

190 Genes with same expression patterns during seed ageing may related to ageing metabolic  
191 processes [17]. To identify the function of genes, researchers clustered genes with similar  
192 expression patterns as clues to study the function of unknown genes [18]. The RNA-Seq reads of 8  
193 samples for I178 and X178 after 0d-AA and 5d-AA (2 replications) were aligned to the maize  
194 reference genome (ZmB73\_RefGen\_v3), the reads coverage and the correlation between 2  
195 replications was relatively high which reflected by the FPKM distribution and pearson correlation  
196 as shown in supplementary (**Fig S1**). The expressed genes in I178 and X178 were 26,909 and  
197 26,514, respectively, among that 25,242 common genes (more than 94%) expressed in both 178  
198 seeds (FPKM > 0.1). To identify genes involving in seeds ageing, we focused on genes that  
199 differential expressed after 5d-AA (compared to 0d-AA), totally 286 and 220 DEGs were detected  
200 in I178 and X178, and 98 common DEGs in both I178 and X178 ( $\log_2FC \geq 0.585$ ). Only 2  
201 common up-regulated and 86 down-regulated genes identified in two 178 (**Fig 2C; Table S2**).

202

### 203 3.4 GO enrichment of DEGs after 5d-AA

204 GO is an internationally standardized gene function classification system used to describe the  
205 properties of genes and their products in any organism, which contains three ontologies: biological  
206 process, cellular component and molecular function [19]. The 286 I178 differential expressed  
207 genes were mainly involving in biology process of abiotic response like temperature, salt stress,  
208 osmotic stress, light intensity, heat, ethanol, abiotic stimulus, heat acclimation etc., and the  
209 molecular function of nutrient reservoir activity, chitin binding and catalytic activity (Fig S2A).  
210 While for the 220 X178 DEGs were mainly enriched in cellular component of nuclear part,  
211 organelle lumen, intracellular part and heterochromatin etc. (Fig S2B).  
212 Most of the down-regulated genes in I178 were enriched in stimulus response, including response  
213 to biotic stress (organism stress, external biotic etc), abiotic stress (inorganic substance stress,  
214 chemical, oxygen-containing compound, acid chemical, organic substance, endogenous stimulus,  
215 hormone etc), immune response (defense response, innate immune etc.), and most of DEGs in  
216 X178 were enriched in DNA or protein biosynthesis process like peptide biosynthesis, amide  
217 biosynthesis and translation (Fig 2A-B; D-E). The common 98 DEGs in two 178 were mainly  
218 enriched in cellular component of cell part (GO:0005623; GO:0044464), membrane-enclosed  
219 lumen (GO:0031974), organelle and intracellular organelle (GO:0043226; GO:0044422;  
220 GO:0043233; GO:0043229) and intracellular part (GO:0044424; GO:0070013; GO:0044446;  
221 GO:0043231), RNA polymerase (GO:0030880; GO:0000428; GO:0055029; GO:0016591),  
222 membrane bounded organelle (GO:0043227), transferase complex (GO:0061695) and the nuclear  
223 part (GO:0005634; GO:0044428; GO:000319981; GO:0005654), most of DEGs were  
224 down-regulated, and enriched in biology process of carbohydrate derivative catabolic and

225 molecular function of carbohydrate derivative binding (**Fig S2D, E**). Only two common  
226 up-regulated genes in I178 and X178, gene GRMZM2G353885, encodes a TATA box binding  
227 protein (TBP) associated factor 2, and another gene of no annotation (**Fig S2C**).

228

### 229 **3.5 Analysis of DEGs by qRT-PCR**

230 According to the RNA-Seq results, 9 genes including 7 randomly selected DEGs and 2 longevity  
231 related genes were selected for qRT-PCR validation. The expression patterns of the 7 DEGs were  
232 consistent between qRT-PCR and RNA-seq, indicating that the RNA-seq gene expression was  
233 reliable, two genes (ZmLOX11 and ZmPIMT1) were not able to detected in RNA-Seq analysis,  
234 further qRT-PCR was conducted on I178 and X178 before and after 5d-AA treatment, as  
235 expectation, the expression was extremely low, and was consistent to the q-Teller whole  
236 transcriptome expression result (<http://www.qteller.com/qteller4/>) (**Fig 3**).

237

### 238 **3.6 Alternative splicing (AS) analysis of ageing related transcriptions and GO enrichment**

239 In I178 and X178, we totally identified 51,388~59,146 AS events, including 12 different types  
240 which covered 46,521~ 48,724 transcript isoforms (including 15,984~17,070 genes) (**Table S3**).  
241 Among that, TSS (alternative 5' first exon) and TTS (alternative 3' last exon) account for more  
242 than 72% of the total AS events, and IR (Intron retention), AE (Alternative exon) and SKIP  
243 (Skipped exon) were also frequently occurred in I178 and X178 (**Fig S3A**). In dry seeds (0d-AA),  
244 we detected 56,228 and 53,593 AS events in I178 and X178, respectively, which cover 20,446 and  
245 19,623 transcripts in I178 and X178, respectively. After 5d-AA, we detected 55,763 and 56,794  
246 AS events in I178 and X178, which cover 20,073 and 19,845 transcripts, respectively (**Fig S3A**;

247 **Table S3**). By comparing AS in I178 and X178 before and after 5d-AA, we noticed that 63.6%  
248 transcript isoforms (15,606, cover 12,834 genes) occurred AS in all samples. In order to discover  
249 that AS genes may involving in seed ageing, we only focus on AS genes that specifically  
250 identified in I178 and X178 after 5d-AA: 381 transcript isoforms (including 169 genes) occurred  
251 AS in both 178 lines, 849 transcript isoforms (including 415 genes) specifically occurred AS in  
252 I178 and 760 transcript isoforms (including 343 genes) specifically occurred AS in X178 after  
253 5d-AA (**Fig S3B**). In order to identify the relationship of AS genes and the ageing related  
254 procedure, Agri-Go analysis on common AS genes in I178 and X178 showed that the enriched in  
255 nucleotide biosynthesis process, function as nucleoside binding (**Fig 4A**). For those AS genes  
256 specifically occurred in I178 and X178 after 5d-AA, beside of the molecular function of  
257 ribonucleoside binding, ATP binding etc., some were also enriched in freezing response (**Fig 4B**).  
258 Combine the DEG and the AS gene information in this study, only 6 X178 specific DEGs  
259 specifically occurred AS and one I178 specific DEG specifically occurred AS after 5d-AA (**Table**  
260 **1; Fig S3C**).

261

## 262 **4. Discussion**

### 263 **4.1 Seed storability was decreased dramatically in I178 after AA treatment**

264 I178 was derived from X178 and less polymorphic segments was detected among the  
265 chromosomes except chromosomes 7 and 10 by performing 6K maize array chip, the only  
266 significant difference between X178 and I178 is the seed vigor which was validated by previous  
267 study [20]. The electrolytic exudate conductivity of the seed reflects the permeability of the seeds  
268 coat, also represent the damage of cellular membrane system, our test of seed vigor of FH seeds

269 after 3d-AA and 5d-AA was consistent to Liu's result. Obviously, the seeds storability was  
270 constantly decreased even stored at relative low temperature, and the ageing level of fresh  
271 harvested seeds after 5d-AA was stronger than 1-year storage in cold room (**Fig 1**). As we know  
272 the deterioration exists inevitably, to slow down the loss of longevity, keep the seeds in a lower  
273 temperature (possible 4 °C) is a better choice. Seeds storage protein (SSP) have been described as  
274 a primary target for oxidation in seeds, zein is the largest component of SSP which account for  
275 60% of SSP [21]. Carbonylation of SSPs during long-term storage was an irreversible form of  
276 oxidation leading to deterioration in both after-ripen seeds and aged seeds [22, 23]. More studies  
277 found that SSPs were degraded during seed germination, which also differential expressed in aged  
278 seeds, indicating the role of SSPs in seed longevity [24, 6, 7, 16]. In our study, we do observed the  
279 degradation of the SSPs (zein) after 48 hours of germination in both I178 and X178. Previous  
280 study proved that the oxidative SSPs were more easily degraded into smaller polypeptides or  
281 amino acids [16], in our observation, the total amount of zein was decreased significantly after  
282 5d-AA in I178 and 7d-AA in both 178 lines, was consistent to above result.

283

#### 284 **4.2 Seed ageing affects numerous biology processes including stress defense and** 285 **carbohydrates metabolisms**

286 Seed ageing is an inevitable procedure occurred on all living things. The consensus molecular  
287 mechanism associated to the ageing is including: 1) Peroxidation of plasma membrane and  
288 disintegration of membrane system structures. 2) Variation of biomacromolecule, including  
289 variation of nucleic acid (RNA and DNA) and enzyme/proteins. 3) The accumulation of toxic  
290 substances, i.e., Reactive oxygen species (ROS), malondialdehyde (MDA), and the by-products of

291 seeds physiological activity, organic substance like alcohols, free fatty acids etc. [25, 16]. In our  
292 RNA-Seq analysis 5d-AA treated 178 lines, 98 common DEGs were identified in both 178 seeds,  
293 while only 88 genes have same expression pattern in I178 and X178, 86 of which were  
294 down-regulated and enriched in carbohydrate derivative catabolic process (Fig S2E).  
295 Interestingly, Lv et al revealed that the proteins in carbohydrate derivative biological pathway  
296 were up-regulated in aged wheat seed especially the up-regulation of genes in amide biosynthesis  
297 pathway, and the genes in defense- and stress response were down regulated after ageing [14]. In  
298 our study, most of the DEGs (including up- and down-regulated genes) were enriched in defense-  
299 and stress pathways in I178 after ageing. The inconsistency between two studies can be explained  
300 by the different ageing level of the wheat seeds and maize seeds, in Lv's study, the germination  
301 rate of aged wheat was lower than 20% while based on Liu's result, the GR of 5d-AA treated I178  
302 and X178 was around 20% and 80%, respectively [20]. We do observed a enrichment of  
303 up-regulated genes in carbohydrate catabolic process in I178 (GO:0016052), while  
304 down-regulated in X178, i.e., GRMZM2G176307, which encodes a glyceraldehyde-3-phosphate  
305 dehydrogenase C2. In Xin's proteome analysis on maize, they mentioned that the carbohydrates  
306 utilization was important in seed ageing and seed vigor, was been influenced in aged seeds [4],  
307 which was also consistent to our results. The X178 down-regulated genes were enriched in amide  
308 and peptide biosynthesis after 5d-AA (Fig 2E), which was inconsistent with Lv's result, it was  
309 possible that X178 possess a better resistant to ageing, after 5d-AA treatment of, the DNA and  
310 protein repair systems was slightly affected which reflected by the down-regulation of ageing  
311 affected genes, while as the constant ageing treatment once GR was below 20%, some of the stress  
312 response genes will be activated and up-regulated to coping with DNA and protein damage.

313

#### 314 **4.3 ZmPIMT1 and LOX11 were down-regulated after 5d-AA**

315 To validate the RNAseq data, qRT-PCR was performed on 9 of randomly selected genes may  
316 related to ageing and consistent results were obtained on both platforms. Protein-L-isoaspartyl  
317 (d-aspartyl) O-methyltransferase (PIMT), a typical protein repair methyltransferase related to seed  
318 longevity by recognizes isoAsp residues in proteins or peptides and catalyzes the transfer of a  
319 methyl group from S-adenosyl methionine (AdoMet) to the free  $\alpha$ -carboxyl group of abnormal  
320 L-isoAsp residues (as well as the  $\beta$ -carboxyl group of D-aspartyl residues) [26, 27]. There are two  
321 PIMT orthologues in Arabidopsis and maize, in this study, ZmPIMT2 share 65% sequence  
322 identity with the AtPIMT1, was not affected in both I178 and X178, ZmPIMT1 share 71%  
323 sequence identity to AtPIMT1, was not been detected in RNA-Seq experiment. qRT-PCR of  
324 PIMT1 showed that ZmPIMT1 was almost no expression signal in 178 seeds in all samples (**Fig**  
325 **3**), indicating that the spatio-temporal expression specificity of PIMT1 in dicotyledon and  
326 Monocotyledon plants. Lipoxygenase (LOX) was also a typical longevity related protein which  
327 associated to the lipid oxidation in seed or other tissue [28]. There are 13 ZmLOX gene have been  
328 identified in maize so far, but few of them have been cloned or further studies in molecular  
329 biology level [27]. In Arabidopsis. LOX2 is essential for formation of green leaf volatiles and  
330 five-carbon volatiles [29], the homolog ZmLOX11 in this study was no expression in RNA-Seq as  
331 well, which is normal since the gene expression in q-Teller showed that this gene was only highly  
332 expressed in the young seeds while little expression observed in mature seed (**Fig S4**). qRT-PCR  
333 showed that ZmLOX11 was down-regulated in I178, while up-regulated in X178 after 5d-AA  
334 treatment, a possibility that LOX11 was not specific expressed in seeds, or the spatiotemporal

335 specificity of the LOX11 in tissue except the seeds (**Fig 3**).

336

#### 337 **4.4 Identify genes potentially associated to seed longevity**

338 Numerous studies reported that the seed longevity genes may involve in switching off metabolic

339 activity in seeds, repair systems during seed imbibition and DNA, RNA or protein repair systems

340 [25]. In previous study, QTL mapping of seeds ageing traits on RILs and F<sub>2,3</sub> populations of I178

341 × X178, 17 QTL were identified on 5 chromosomes [20]. In order to excavating genes that

342 involving in seed longevity, DEGs in QTL mapping intervals for both I178 and X178 were

343 selected for analysis, 13 DEGs located in the mapped QTL of chromosome 3 (11 genes) and

344 chromosome 5 (2 genes), for the 10 DEGs with explicated annotations, DEG4 encodes a

345 peroxisomal ABC transporter 1, previous study showed that the peroxisomal ABC transporter in

346 plant was essential for transporting hydrophobic fatty acids and large cofactor molecules (carrier

347 for ATP, NAD and CoA), and play an indispensable role in pathways like fatty acid β-oxidation,

348 photorespiration, and degradation of reactive oxygen species [30], it was possible that during seed

349 ageing, the accumulation of reactive oxygen species in seed resulted the down-regulation of

350 DEG4. DEG7 encodes a proteases 6, In Arabidopsis, the aspartic protease 1 (ASPG1) was

351 affected the seed longevity and germination by the process of proteolysis [31], proteases 6 was the

352 major cellular machinery of proteolysis in eukaryotic organisms, it was possible that DEG7 was

353 also regulated by seed ageing. DEG10 encodes a BURP domain-containing protein, a newly

354 identified protein that is unique to plants and plays an important role in plant abiotic stresses,

355 development and metabolism via regulating the level of diverse proteins [32, 33]. DEG12 encodes

356 a phenylalanine ammonia lyase homolog1 (PAL1), PAL genes was been reported involving in



357 multiple biology process including response to environmental stress [35]. Based on the annotation  
358 of above genes, it was possible that those genes may function in ageing induced defense response,  
359 energy metabolism and the DNA/RNA and protein repair systems (Table 1).

360

361 Alternative splicing is a process whereby multiple functionally distinct transcripts are encoded  
362 from a single gene by the selective removal or retention of exons and/or introns from the maturing  
363 RNA [36, 37], which is common in many eukaryote lineages, including metazoans, fungi, plants  
364 and showing over 95% of multi-exon genes in human genome produce at least one alternatively  
365 spliced isoform [38-42]. In this study we identified 7 AS-DEGs in I178 and X178, DEG14  
366 encodes a HSP20-like chaperones superfamily protein. DEG15 encodes a NADH dehydrogenase  
367 subunit 4, an important enzyme in the respiratory chain of all organisms having an aerobic or  
368 anaerobic electron-transport system in mitochondria [43]. DEG16 encodes an embryo defective  
369 3012, was down-regulated and affected by ageing. DEG17 is an auxin transport protein (BIG) that  
370 in charge of the auxin polar transportation and distribution, gibberellin status in seed [44, 45].  
371 DEG18 encodes a sucrose synthase 3, which was participate in respiration and related to plant  
372 growth [46]. DEG19 encodes a 27-kDa zein protein (zp27), specifically expressed in maize and  
373 may functions like a protease inhibitor [47]. Up-regulation of DEG14, 15, 17, 18 and 19 indicated  
374 those genes were potential ageing related genes that involved in stress response, energy  
375 metabolism, development regulation etc.

376

377

378 **Reference**

- 379 1. Agacka-Moldoch M, Nagel M, Doroszewska T, Lewis RS, Börne A. Mapping quantitative  
380 trait loci determining seed longevity in tobacco (*Nicotiana tabacum* L.). *Euphytica*. 2015;  
381 202(3): 479-486.
- 382 2. Walters C. Understanding the mechanisms and kinetics of seed ageing. *Seed Sci. Res.* 1998;  
383 8: 223-244.
- 384 3. Groot S, Surki A, Vos R and Kodde J. Seed storage at elevated partial pressure of oxygen, a  
385 fast method for analysing seed ageing under dry conditions. *Ann. Bot.* 2012; 110: 1149-1159.
- 386 4. Xin X, Lin X, Zhou Y, Chen X, Liu X, Lu X. Proteome analysis of maize seeds: the effect of  
387 artificial ageing. *Physiol. Plantarum*. 2011; 143, 126-138.
- 388 5. Xin X, Tian Q, Yin G, Chen X, Zhang J, Ng S. Reduced mitochondrial and  
389 ascorbate-glutathione activity after artificial ageing in soybean seed. *J. Plant Physiol.* 2014;  
390 171, 140-147.
- 391 6. Nguyen TP, Cueff G, Hegedus DD, Rajjou L, Bentsink L. A role for seed storage proteins in  
392 *Arabidopsis* seed longevity. *J. Exp. Bot.* 2015; 66, 6399-6413.
- 393 7. Yin G, Xin X, Fu S, An M, Wu S, Chen X, Zhang J, He J, Whelan J, Lu X. Proteomic and  
394 carbonylation profile analysis at the critical node of seed ageing in *oryza sativa*. *Sci. Rep.*  
395 2017; 7, 1-12.
- 396 8. He Y, Cheng J, Li X. Acquisition of desiccation tolerance during seed development is  
397 associated with oxidative processes in rice. *Botanique*. 2015; 94(2): 91-101.
- 398 9. Debeaujon I, Leon-Kloosterziel KM, Koornneef M. Influence of the testa on seed dormancy,  
399 germination, and longevity in *Arabidopsis*. *Plant Physiol.* 2000; 122(2): 403-414
- 400 10. Murthy UMN, Kumar PP, Sun WQ. Mechanisms of seed ageing under different storage

- 401 conditions for *Vigna radiata* (L.) Wilczek: lipid peroxidation, sugar hydrolysis, Maillard  
402 reactions and their relationship to glass state transition. *J Exp Bot.* 2003; 54(384): 1057-1067.
- 403 11. Zhan J, Li W, He HY, Li CZ, He LF. Mitochondrial alterations during AI-induced PCD in  
404 peanut root tips. *Plant Physiol Biochem.* 2014; 75:105-113.
- 405 12. Yin G, Whelan J, Wu S, Zhou J, Chen B, Chen X, Zhang J, He J, Xin X, Lu X.  
406 Comprehensive mitochondrial metabolic shift during the critical node of seed ageing in rice.  
407 *PLoS One.* 2016; 11, e0148013.
- 408 13. Sano N, Kim JS, Onda Y, Nomura T, Mochida K. Okamoto M, Seo M. RNA-Seq using  
409 bulked recombinant inbred line populations uncovers the importance of brassinosteroid for  
410 seed longevity after priming treatments. *Scientific report.* 2017; 7: 8095  
411 [https://doi:10.1038/s41598-017-08116-5](https://doi.org/10.1038/s41598-017-08116-5)
- 412 14. Lv Y, Zhang S, Wang J, Hu Y. Quantitative Proteomic Analysis of Wheat Seeds during  
413 Artificial Ageing and Priming Using the Isobaric Tandem Mass Tag Labeling. *PLOS ONE.*  
414 2016; DOI:10.1371/journal.pone.0162851 September 15, 2016
- 415 15. Wang W, Liu S, Song S, Møller IM. Proteomics of seed development, desiccation tolerance,  
416 germination and vigor. *Plant Physiol. Biochem.* 2015; 86, 1-15.
- 417 16. Chen X, Yin G, Börnerb A, Xin X, He J, Nage M, Liu X, Lu X. Comparative physiology and  
418 proteomics of two wheat genotypes differing in seed storage tolerance. *Plant Physiology and*  
419 *Biochemistry.* 2018; 130:455-463. <https://doi.org/10.1016/j.plaphy.2018.07.022>
- 420 17. Mao X, Cai T, Olyarchuk JG, Wei L. Automated genome annotation and pathway  
421 identification using the KEGG Orthology (KO) as a controlled vocabulary. *Bioinformatics.*  
422 2005; 21, 3787±93. <https://doi.org/10.1093/bioinformatics/bti430> PMID: 15817693.

- 423 18. Rajandeeep S, Sekhon RB, Candice N, Hirsch CL, Natalia L, Shawn M, et al. Maize gene  
424 atlas developed by RNA sequencing and comparative evaluation of transcriptomes based on  
425 RNA sequencing and microarrays. PLoS ONE. 2013; 8:E61005.  
426 <https://doi.org/10.1371/journal.pone.0061005>. PMID:23637782.
- 427 19. Young MD, Wakefield MJ, Smyth GK, Oshlack A. Gene ontology analysis for RNA-seq:  
428 Accounting for selection bias. Genome Biol. 2010; 11, R14.  
429 <https://doi.org/10.1186/gb-2010-11-2-r14> PMID: 20132535.
- 430 20. Liu Y, Zhang H, Li X, Wang F, Lyle D, Sun L, Wang G, Wang J, Li L, Gu R. Quantitative  
431 trait locus mapping for seed artificial aging traits using an F<sub>2:3</sub> population and a recombinant  
432 inbred line population crossed from two highly related maize inbreds. Plant Breeding. 2018;  
433 (138):29-37. <https://doi.org/10.1111/pbr.12663>.
- 434 21. Shewry PR, Halford NG. Cereal seed storage proteins: Structures, properties and role in grain  
435 utilization. J Exp Bot. 2002; 53:947-958.
- 436 22. Rajjou L, Miche L, Huguet R, Job C, Job D. The use of proteome and transcriptome profiling  
437 in the understanding of seed germination and identification of intrinsic markers determining  
438 seed quality, germination efficiency and early seedling vigour. In: Navie SC, Adkins SW,  
439 Ashmore S, eds. Seeds: Biology, Development and Ecology . Oxfordshire, CAB  
440 International, 2007; 149-158.
- 441 23. Rajjou J, Lovigny Y, et al. Proteome-Wide Characterization of Seed Aging in Arabidopsis: A  
442 Comparison between Artificial and Natural Aging Protocols. Plant Physiology. 2008; 148:  
443 620-641. <https://doi.org/10.1104/pp.108.123141>
- 444 24. Bewley JD. Seed germination and dormancy. Plant Cell. 1997; 9: 1055-1066.

- 445 25. Sano N, Rajjou L, North HM, Debeaujon I, Marion-Poll A, Seo M. Staying Alive: Molecular  
446 Aspects of Seed Longevity. *Plant Cell Physiol.* 2016; 57(4):660-74. [https://doi:](https://doi:10.1093/pcp/pcv186)  
447 10.1093/pcp/pcv186.
- 448 26. Petla BP, Kamble NU, Kumar M, Verma P, Ghosh S, Singh A, Rao V, Salvi P, Kaur H,  
449 Saxena SC, Majee M. Rice PROTEIN I-ISOASPARTYL METHYLTRANSFERASE  
450 isoforms differentially accumulate during seed maturation to restrict deleterious isoAsp and  
451 reactive oxygen species accumulation and are implicated in seed vigor and longevity. *New*  
452 *Phytol.* 2016; 211(2):627-45. [https://doi.org/ 10.1111/nph.13923](https://doi.org/10.1111/nph.13923).
- 453 27. Ogunola OF, Hawkins LK, Mylroie E, Kolomiets MV, Borrego E, Tang JD, Williams WP,  
454 Warburton ML. Characterization of the maize lipoxygenase gene family in relation to  
455 aflatoxin accumulation resistance. *PLoS One.* 2017; 12(7):e0181265. [https://doi:](https://doi:10.1371/journal.pone.0181265)  
456 10.1371/journal.pone.0181265. eCollection 2017.
- 457 28. Li Z, Gao Y, Lin C, Pan R, Ma W, Zheng Y, Guan Y, Hu J. Suppression of LOX activity  
458 enhanced seed vigour and longevity of tobacco (*Nicotiana tabacum* L.) seeds during storage.  
459 *Conserv Physiol.* 2018; 6(00): coy047; <https://doi.org/10.1093/conphys/coy047>.
- 460 29. Mochizuki S, Sugimoto K, Koeduka T, Matsui K. Arabidopsis lipoxygenase 2 is essential for  
461 formation of green leaf volatiles and five-carbon volatiles. *FEBS Lett.* 2016; 590(7):1017-27.  
462 <https://doi:10.1002/1873-3468.12133>.
- 463 30. Charton L, Plett A, Linka N. Plant peroxisomal solute transporter proteins. *J Integr Plant*  
464 *Biol.* 2019; Accepted. <https://doi.org/10.1111/jipb.12790>
- 465 31. Yashwanti Mudgil, Shin-Han Shiu, Sophia L. Stone, Jennifer N. Salt, and Daphne R. Goring.  
466 A Large Complement of the Predicted Arabidopsis ARM Repeat Proteins Are Members of

- 467 the U-Box E3 Ubiquitin Ligase Family Plant Physiol. 2004; (134):59-66
- 468 32. Shen W, Yao X, Ye T, Ma S, Liu X, Yin X, Wu Y. Arabidopsis Aspartic Protease ASPG1  
469 Affects Seed Dormancy, Seed Longevity and Seed Germination. Plant Cell Physiol. 2018;  
470 59(7):1415-1431. [https://doi: 10.1093/pcp/pcy070](https://doi.org/10.1093/pcp/pcy070).
- 471 33. Dinh SN and Kang H. An endoplasmic reticulum-localized Coffea arabica BURP  
472 domain-containing protein affects the response of transgenic Arabidopsis plants to diverse  
473 abiotic stresses. Plant Cell Rep. 2017; 36(11):1829-1839. [https://doi:](https://doi.org/10.1007/s00299-017-2197-x)  
474 [10.1007/s00299-017-2197-x](https://doi.org/10.1007/s00299-017-2197-x).
- 475 34. Li Y, Chen X, Chen Z, Cai R, Zhang H, Xiang Y. Identification and Expression Analysis of  
476 BURP Domain-Containing Genes in Medicago truncatula. Front Plant Sci. 2016; 7:485.  
477 [https://doi: 10.3389/fpls.2016.00485](https://doi.org/10.3389/fpls.2016.00485). eCollection 2016.
- 478 35. Huang J, Gu M, Lai Z, Fan B, Shi K, Zhou YH, Yu JQ, Chen Z. Functional analysis of the  
479 Arabidopsis PAL gene family in plant growth, development, and response to environmental  
480 stress. Plant Physiol. 2010; 153(4):1526-38. [https://doi: 10.1104/pp.110.157370](https://doi.org/10.1104/pp.110.157370).
- 481 36. Chow LT, Gelinis RE, Broker TR, Roberts RJ. An amazing sequence arrangement at the  
482 5'ends of adenovirus 2 messenger RNA. Cell. 1977; 12, 1-8. [https://doi:](https://doi.org/10.1016/0092-8674(77)90180-5)  
483 [10.1016/0092-8674\(77\)90180-5](https://doi.org/10.1016/0092-8674(77)90180-5)
- 484 37. Bush SJ, Chen L, Tovar-Corona JM, Urrutia AO. Alternative splicing and the evolution of  
485 phenotypic novelty. Philos Trans R Soc Lond B Biol Sci. 2017; 372(1713): 20150474.  
486 [https://doi: 10.1098/rstb.2015.0474](https://doi.org/10.1098/rstb.2015.0474)
- 487 38. Kim N, Alekseyenko AV, Roy M, Lee C. The ASAP II database: analysis and comparative  
488 genomics of alternative splicing in 15 animal species. Nucleic Acids Res. 2007; 35,

- 489 D93-D98. [https://doi: 10.1093/nar/gkl884](https://doi.org/10.1093/nar/gkl884)
- 490 39. Grutzmann K, Szafranski K, Pohl M, Voigt K, Petzold A, Schuster S. Fungal alternative  
491 splicing is associated with multicellular complexity and virulence: a genome-wide  
492 multi-species study. *DNA Res.* 2014; 21, 27-39. [https://doi: 10.1093/dnares/dst038](https://doi.org/10.1093/dnares/dst038)
- 493 40. Zhang C, Yang H, Yang H. Evolutionary character of alternative splicing in plants.  
494 *Bioinform. Biol. Insights.* 2016; 9(Suppl 1), 47-52. [https://doi: 10.4137/BBI.S33716](https://doi.org/10.4137/BBI.S33716).  
495 eCollection 2015.
- 496 41. Pan Q, Shai O, Lee LJ, Frey BJ, Blencowe BJ. Deep surveying of alternative splicing  
497 complexity in the human transcriptome by high-throughput sequencing. *Nat. Genet.* 2008;  
498 40, 1413-1415. [https://doi: 10.1038/ng.259](https://doi.org/10.1038/ng.259)
- 499 42. Wang ET, Sandberg R, Luo SJ, Khrebtkova I, Zhang L, Mayr C, Kingsmore SF, Schroth  
500 GP, Burge CB. Alternative isoform regulation in human tissue transcriptomes. *Nature.* 2008;  
501 456, 470-476. [https://doi: 10.1038/nature07509](https://doi.org/10.1038/nature07509)
- 502 43. Matsushita K, Otofujii A, Iwahashi M, Toyama H, Adachi O. NADH dehydrogenase of  
503 *Corynebacterium glutamicum*. Purification of an NADH dehydrogenase II homolog able to  
504 oxidize NADPH. *FEMS Microbiol Lett.* 2001; 204 (2):271-6.  
505 <https://doi.org/10.1111/j.1574-6968.2001.tb10896.x>. PMID: 11731134
- 506 44. Gil P, Dewey E, Friml J, Zhao Y, Snowden KC, Putterill J, Palme K, Estelle M, Chory J.  
507 BIG: a calossin-like protein required for polar auxin transport in *Arabidopsis*. *Genes Dev.*  
508 2001; 15(15):1985-97.
- 509 45. Desgagné-Penix I, Eakanunkul S, Coles JP, Phillips AL, Hedden P, Sponsel VM. The auxin  
510 transport inhibitor response 3 (tir3) allele of BIG and auxin transport inhibitors affect the

- 511 gibberellin status of Arabidopsis. *Plant J.* 2005; 41(2):231-42.
- 512 46. Daloso DM, Williams TC, Antunes WC, Pinheiro DP, Müller C, Loureiro ME, Fernie AR.  
513 Guard cell-specific upregulation of sucrose synthase 3 reveals that the role of sucrose in  
514 stomatal function is primarily energetic. *New Phytol.* 2016; 209(4):1470-83. [https://doi:](https://doi:10.1111/nph.13704)  
515 [10.1111/nph.13704](https://doi:10.1111/nph.13704).
- 516 47. Krishnan HB, Jang S, Kim WS, Kerley MS, Oliver MJ, Trick HN. Biofortification of  
517 soybean meal: immunological properties of the 27 kDa  $\gamma$ -zein. *J Agric Food Chem.* 2011;  
518 59(4):1223-8. [https://doi: 10.1021/jf103613s](https://doi:10.1021/jf103613s).
- 519 48. International rules for seed test. International seed testing association (ISTA). Switzerland:  
520 Zurich. 2018; Chapter 15-6.
- 521 49. Oliveros JC. VENNY. An interactive tool for comparing lists with Venn Diagrams. 2007;  
522 <http://bioinfogp.cnb.csic.es/tools/venny/index.html>.
- 523 50. Tian T, Liu Y, Yan H, You Q, Yi X, Du Z, Xu W, Su Z. AgriGO v2.0: a GO analysis toolkit  
524 for the agricultural community. *Nucleic Acids Res.* 2017; 45(Web Server issue):  
525 W122-W129. [https://doi: 10.1093/nar/gkx382](https://doi:10.1093/nar/gkx382).

526

## 527 **Acknowledgements**

528 We acknowledge the financial support from National Key R&D Program of China  
529 (2017YFD0102001-3 & 2018YFD0100900-3), National Natural Science Foundation of China  
530 (31701437 & 31771891) and the China Agriculture Research System (CARS-02-10).

531

## 532 **Supporting Information**



533 **Fig 1. Storage characterization of I178 and X178 seed. A).** Observation of 3 and 5d-AA seeds;  
534 **B).** TTC staining of embryo at 0d-AA, after 3 and 5d-AA; **C).** The relative conductivity of fresh  
535 harvest (FH) seeds, 1-year storage seeds treated by 3 and 5d-AA; the dash lines indicate the vigor  
536 of FH seeds after 5d-AA was lost more than that of 1-year storage seeds. **D).** SDS-PAGE analysis  
537 of seeds zein, lane 1-12: Dry seeds of X178 and I178 (X178-Dry, I178-Dry), X178 seeds after 6  
538 hours imbibed water (X178-0d-6h), 48-hours germinated X178 seeds (X178-0d-48h), I178 seeds  
539 after 6 hours imbibed water (I178-0d-6h), 48 hours-germinated I178 seeds (I178-0d-48h), X178  
540 seeds after 3d-AA (X178-3d), I178 seeds after 3d-AA (I178-3d), X178 seeds after 5d-AA  
541 (X178-5d), I178 seeds after 5d-AA (I178-5d), X178 seeds after 7d-AA (X178-7d), I178 seeds  
542 after 7d-AA (I178-7d). The degradation of 40 kD protein was denoted as arrow.

543 **Fig 2. RNA-Seq of I178 and X178 and gene expression analysis before and after 5d-AA. A).**  
544 Heatmap of differential expressed genes in I178 after 5d-AA compared with 0d-AA. **B).** Most of  
545 the significantly differential expressed genes in I178 were enriched in 5 categories of Immune  
546 system (red), biotic stress response (green), abiotic stress response (blue), carbohydrate catabolic  
547 process (light blue), nutrient reservoir activity (purple) and extracellular region (pink). **C).**  
548 Compared to the 0d-AA treatment, DEGs after 5d-AA identified in two materials with the  
549 adjusted  $P$ -value  $\leq 0.05$  and the FoldChange  $\geq 1.5$ , there are 188 specific I178 DEGs and 122 X178  
550 specific DEGs, among that, 98 common DEGs identified in I178 and X178, with 2 common  
551 up-regulated and 86 common down-regulated genes. 10 genes were up-regulated in I178 while  
552 down-regulated in X178 was labeled in the triangle. **D).** Heat map of DEGs in X178. **E).** GO  
553 enrichment of the most significantly differential expressed genes in X178.

554 **Fig 3. qRT-PCR validation of the RNA-Seq result. A).** Nine genes including 7 differential

555 expressed genes and 2 ageing related genes validated by qRT-PCR. RNA-Seq gene expression  
556 calculated by fold-change in I178 **(B)** and X178 **(C)**.

557 **Fig 4. GO enrichment of AA induced alternative splicing genes (ASG) in I178 and X178. A).**

558 Biology process, cellular component and the molecular function of common ASGs in I178 and  
559 X178. **B).** 381 alternative splicing genes specifically expressed after 5d-AA in I178 and X178.

560 **Fig S1. Data quality demonstration of RNA-Seq. A).** FPKM distribution of 2 replications of  
561 I178 and X178. **B).** Pearson correlation analysis between samples of I178 and X178.

562 **Fig S2. GO enrichment analysis of the DEGs.** Biology process, cellular component and the  
563 molecular function of 286 I178 DEGs **(A)** and 220 X178 DEGs **(B); C)**. Only 2 co-up regulated  
564 genes detected in both I178 and X178, one of gene encodes a TBP associated factor; **D).** Total 98  
565 common DEGs identified in both I178 and X178; **E).** 86 I178 and X178 commonly down  
566 regulated genes identified in this study, most of the genes involving in carbohydrate catabolic  
567 process and carbohydrate derivative binding.

568 **Fig S3. AS, ASG and AS-DEGs identified in 178. A).** 12 types of AS identified in I178 and  
569 X178 after 0d-AA and 5d-AA. **B).** Transcript isoforms (and the covered genes in brackets) that  
570 occurred AS in I178 and X178 after 0d-AA and 5d-AA, the red colored are genes specifically  
571 spliced in two 178 after 5d-AA. **C).** Alternative spliced DEGs in I178 and X178 after 5d-AA. Six  
572 and one AS-DEGs were identified specifically in X178 and I178, respectively.

573 **Table 1. Potential seed ageing related genes.**

574 **Table S1. Number of reads sequenced and mapped to the maize genome.**

575 **Table S2. The expression of common 98 DEGs and the related biology process classification.**

576 **Table S3. Alternative splicing events and the genes involved in I178 and X178.**

577

578 **Author Contributions**

579 Conceptualization: Li Li

580 Data curation: Li Li.

581 Formal analysis: Li Li, Li Xuhui.

582 Funding acquisition: Wang Guoying and Li Li.

583 Investigation: Li Li, Wangfeng and Peng Yixuan

584 Methodology: Li Li, Wang Feng and Peng Yixuan.

585 Project administration: Li Li.

586 Resources: Wang Guoying, Wang Jianhua and Zhang Hongwei.

587 Software: Li Li, Li Xuhui

588 Supervision: Gu Riliang and Wang Jianhua.

589 Validation: Li Li.

590 Visualization: Li Li.

591 Writing -original draft: Li Li.

592 Writing- review & editing: Li Li and Gu Riliang

**Table 1. Potential seed ageing related genes.**

| <b>DEG ID</b> | <b>Gene ID</b> | <b>I178_ log2FC</b> | <b>X178_ log2FC</b> | <b>Up/ Down</b> | <b>Source.</b>              | <b>Homologs</b> | <b>Annotation</b>                                                    |
|---------------|----------------|---------------------|---------------------|-----------------|-----------------------------|-----------------|----------------------------------------------------------------------|
| DEG1          | GRMZM2G058970  | 0.87                | 0.86                | down            |                             | At5G49930.1     | Zinc knuckle (CCHC-type) family protein                              |
| DEG2          | GRMZM2G302913  | 1.00                | 0.67                | down            |                             | At1G22060.1     | -                                                                    |
| DEG3          | GRMZM2G358618  | 0.74                | 0.84                | down            |                             | At4G03200.1     | Catalytics                                                           |
| DEG4          | GRMZM2G375807  | 1.03                | 0.88                | down            |                             | At4G39850.3     | Peroxisomal ABC transporter 1                                        |
| DEG5          | GRMZM2G379913  | 0.98                | 0.80                | down            |                             | At3G06530.1     | ARM repeat superfamily protein                                       |
| DEG6          | GRMZM2G379929  | 0.96                | 0.88                | down            | <b>QTL(Chr3:8-205 Mb)</b>   | At3G06530.2     | ARM repeat superfamily protein                                       |
| DEG7          | GRMZM2G438938  | 0.86                | 0.86                | down            |                             | At5G02310.1     | Proteolysis 6                                                        |
| DEG8          | GRMZM5G867767  | 0.97                | 0.70                | down            |                             | At3G10650.1     | -                                                                    |
| DEG9          | GRMZM2G181135  | 1.86                | 0.89                | down            |                             | At1G34060.1     | Pyridoxal phosphate (PLP)-dependent Transferases superfamily protein |
| DEG10         | GRMZM5G800586  | 1.27                | 0.77                | down            |                             | At5G25610.1     | BURP domain-containing protein                                       |
| DEG11         | GRMZM5G877838  | 0.97                | 0.89                | down            |                             | Os01g56780.1    | Plus-3 domain containing protein                                     |
| DEG12         | GRMZM2G074604  | 0.80                | 0.86                | down            | <b>QTL(Chr5:185-205 Mb)</b> | AT2G37040.1     | PHE ammonia lyase 1                                                  |
| DEG13         | GRMZM5G824439  | 0.98                | 0.99                | down            |                             | AT1G23230.2     | -                                                                    |
| DEG14         | GRMZM2G158232  | -0.98               | -0.03               | up              | <b>I178_AS-DEG</b>          | At1G53540.1     | HSP20-like chaperones superfamily protein                            |
| DEG15         | GRMZM5G804358  | -0.13               | -1.02               | up              |                             | AtMG00580.1     | NADH dehydrogenase subunit 4                                         |
| DEG16         | GRMZM2G476810  | 0.52                | 0.64                | down            |                             | At5G40480.1     | Embryo defective 3012                                                |
| DEG17         | GRMZM2G461586  | -0.31               | -0.78               | up              | <b>X178_AS-DEG</b>          | At3G02260.1     | Auxin transport protein (BIG)                                        |
| DEG18         | GRMZM2G311182  | -0.39               | -0.71               | up              |                             | At4G02280.1     | Sucrose synthase 3                                                   |
| DEG19         | GRMZM2G138727  | -0.54               | -0.63               | up              |                             | -               | 27-kDa zein protein                                                  |
| DEG20         | GRMZM2G417682  | 0.69                | 0.61                | down            |                             | -               | -                                                                    |

Note: 13 DEGs of two 178 were located in QTL interval derived from RILs and  $F_{2,3}$  populations of I178  $\times$  X178 (DEG1-13); 7 AS-DEGs were identified in I178 (DEG14) and X178 (DEG15-20) after 5d-AA, were possible the Ageing related candidates.

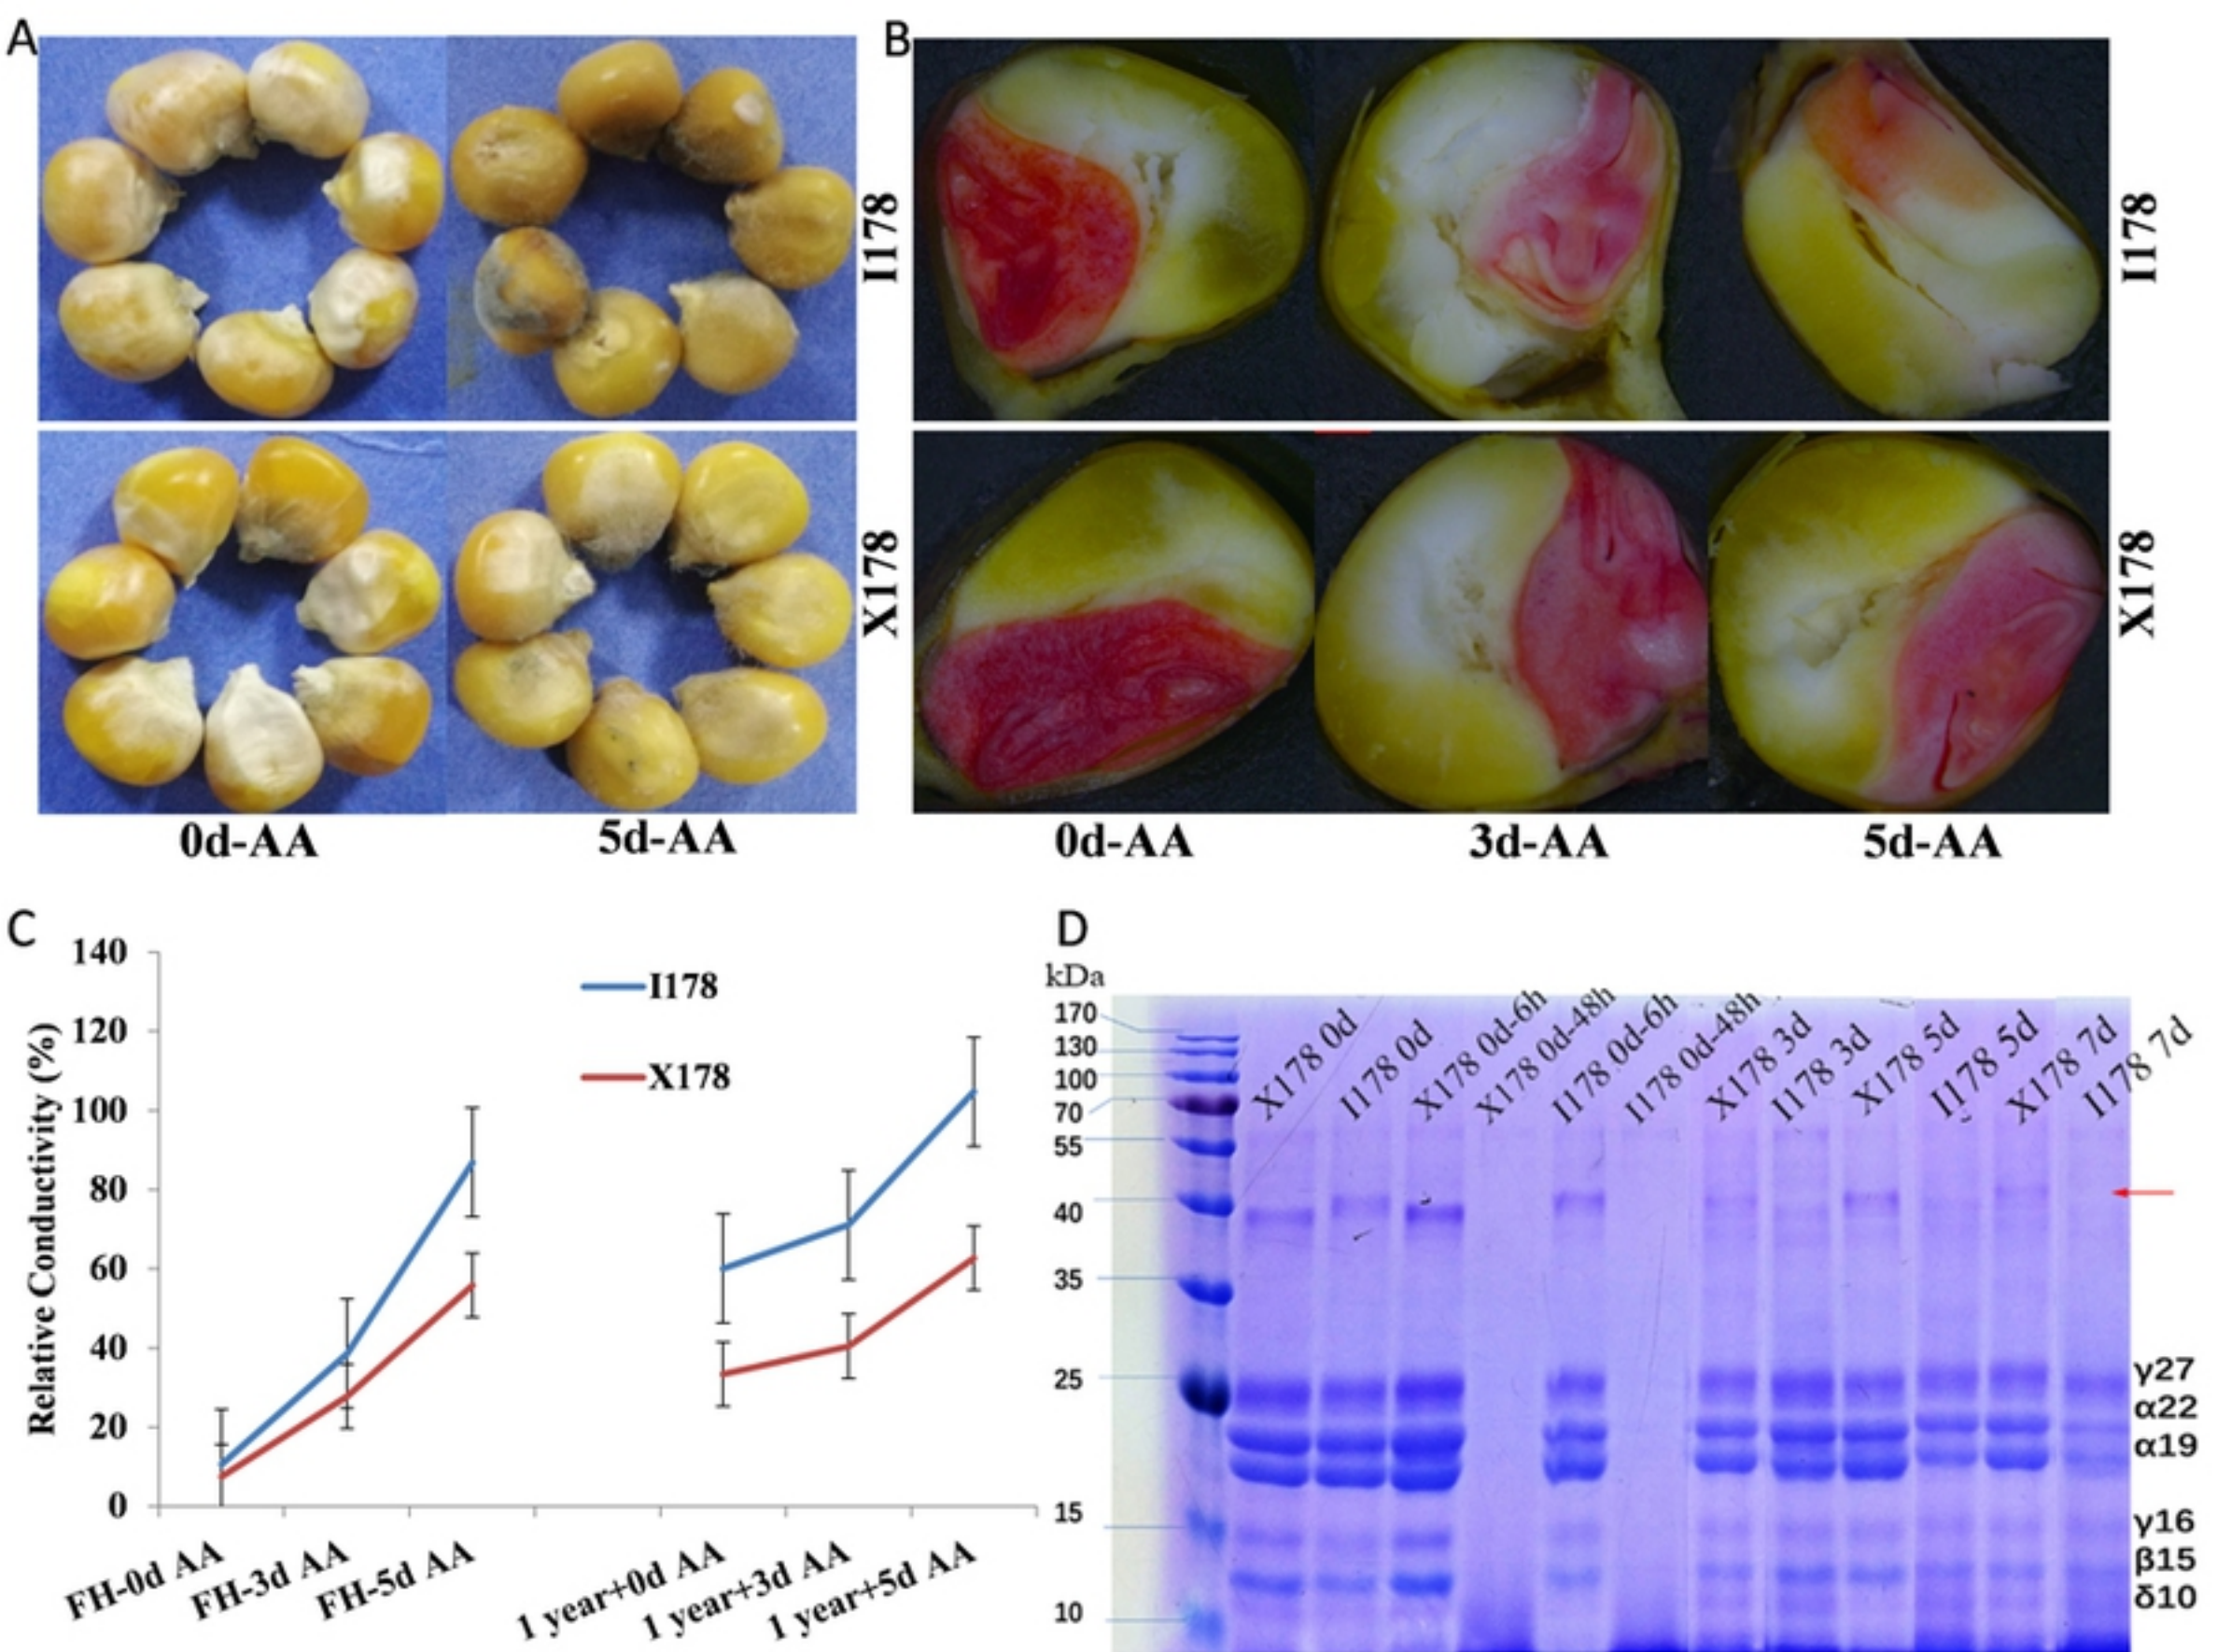

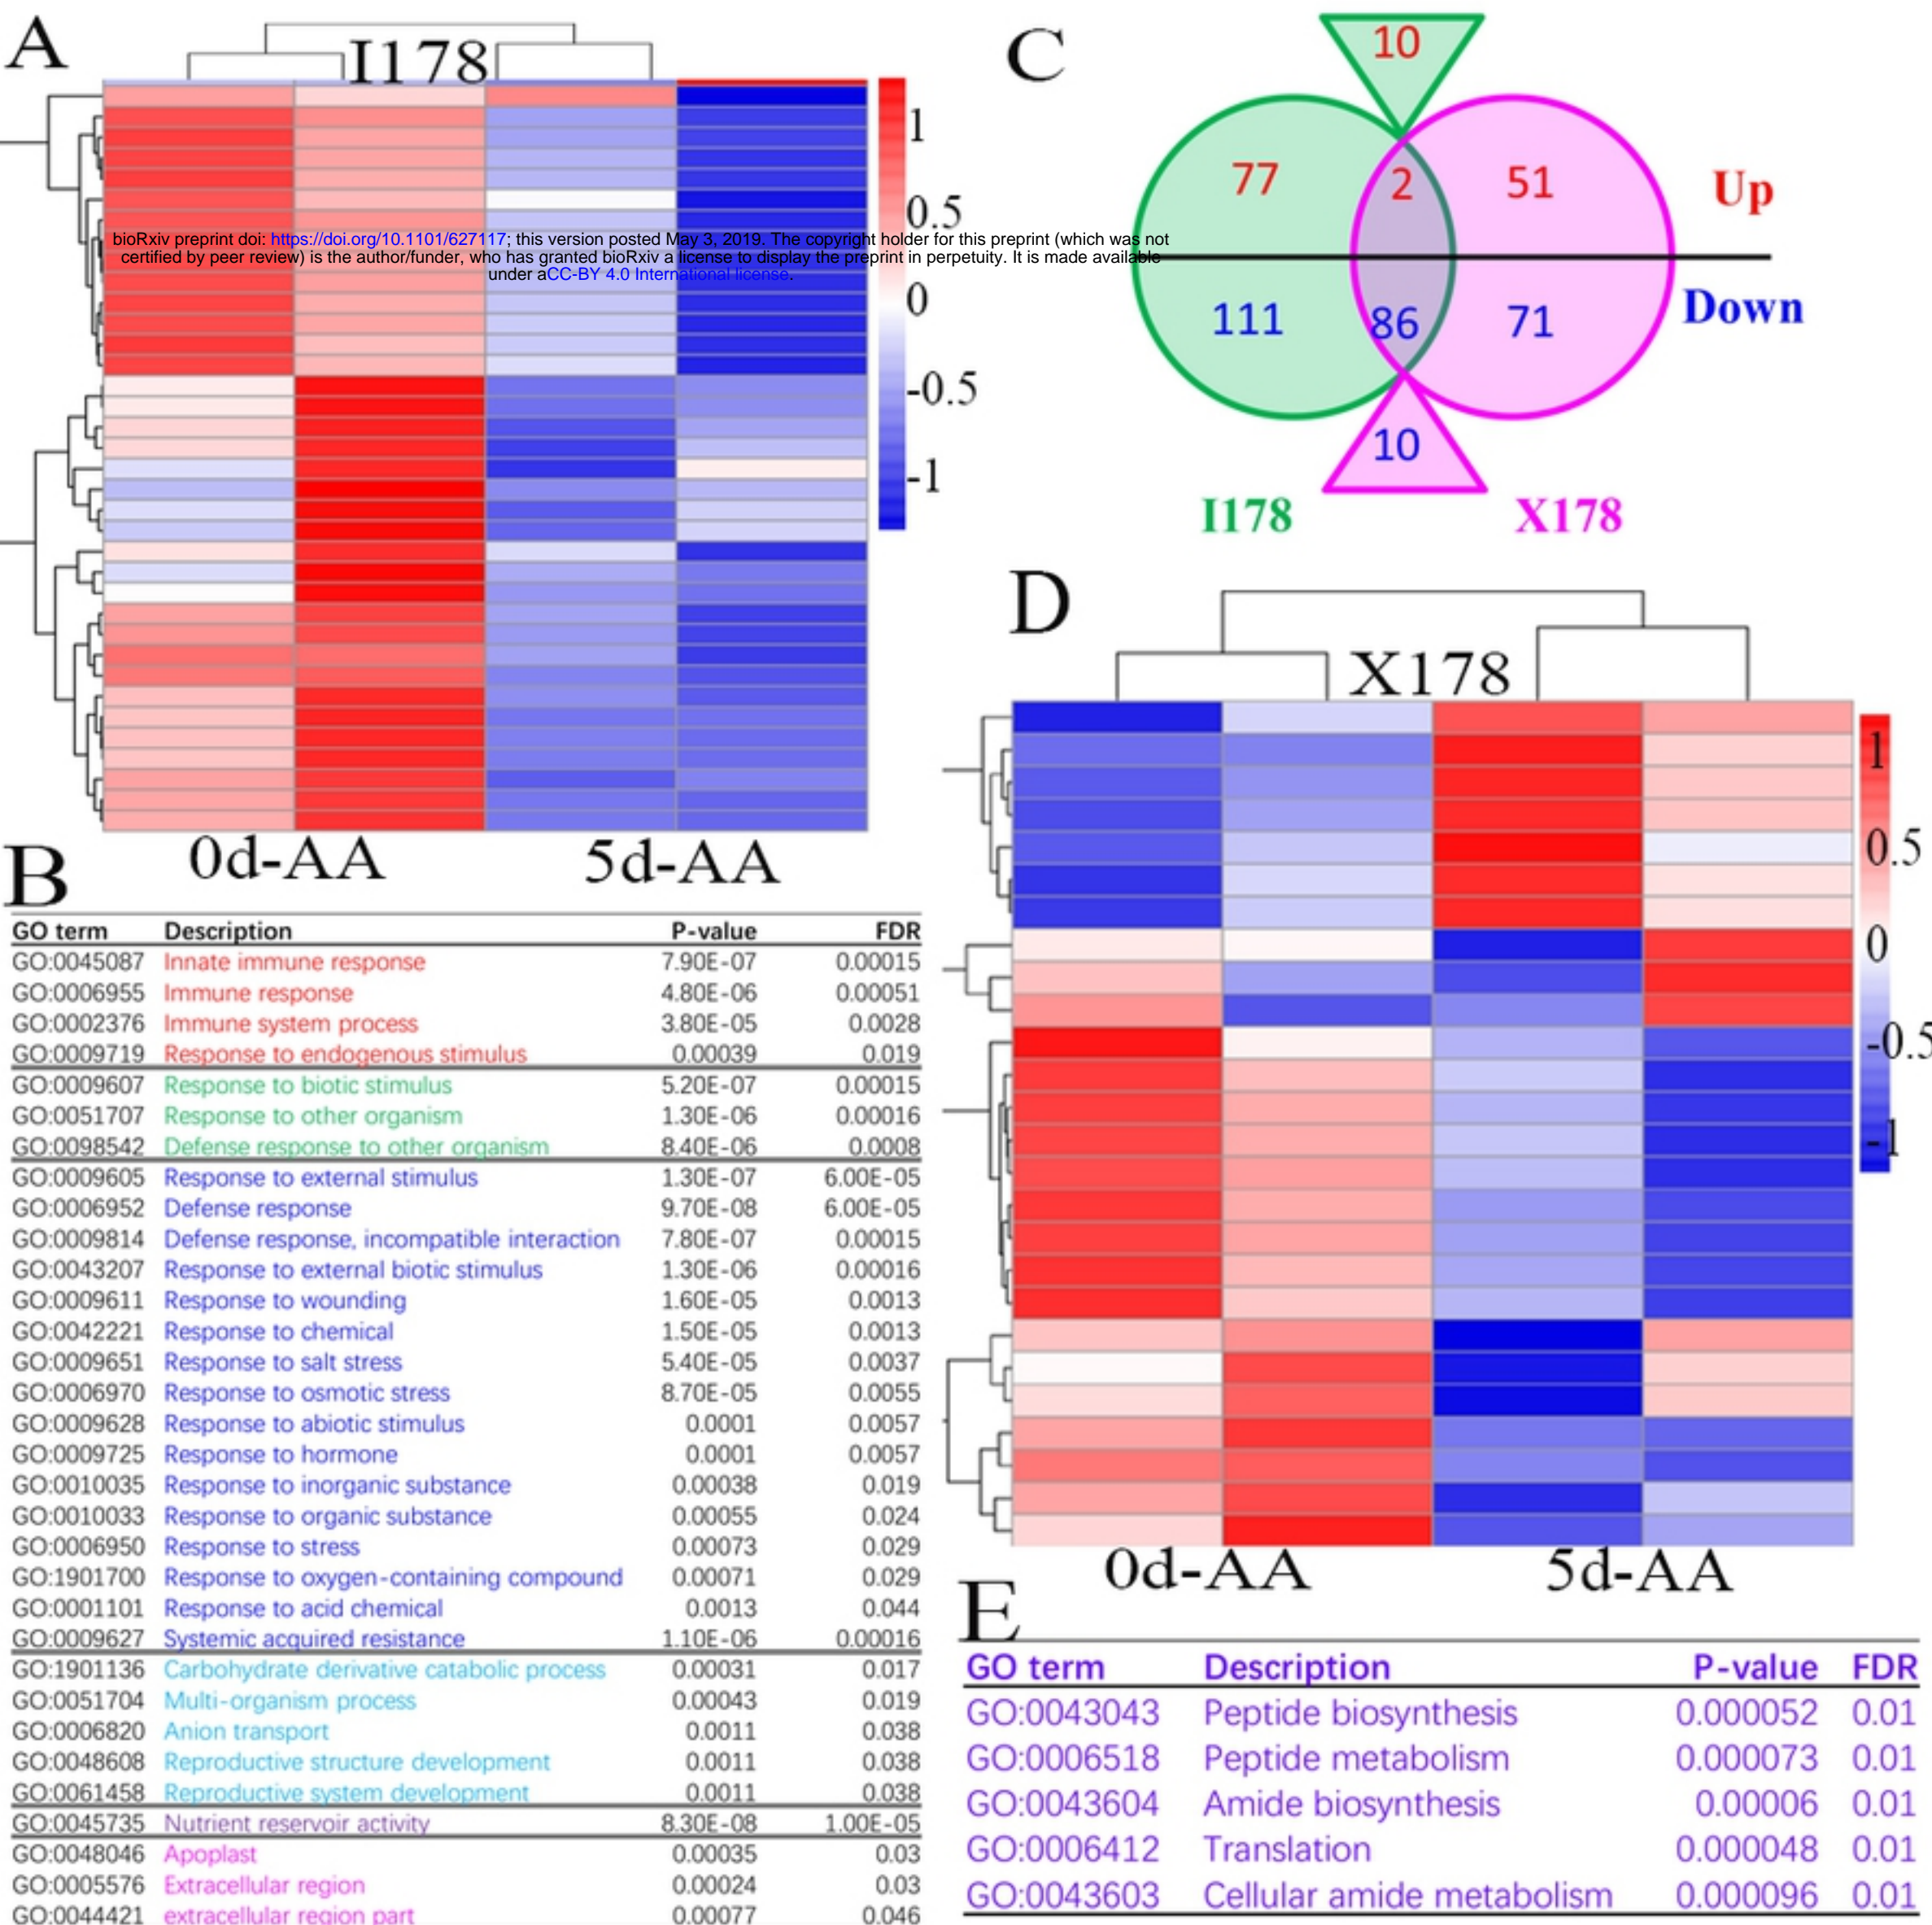

Fig 2

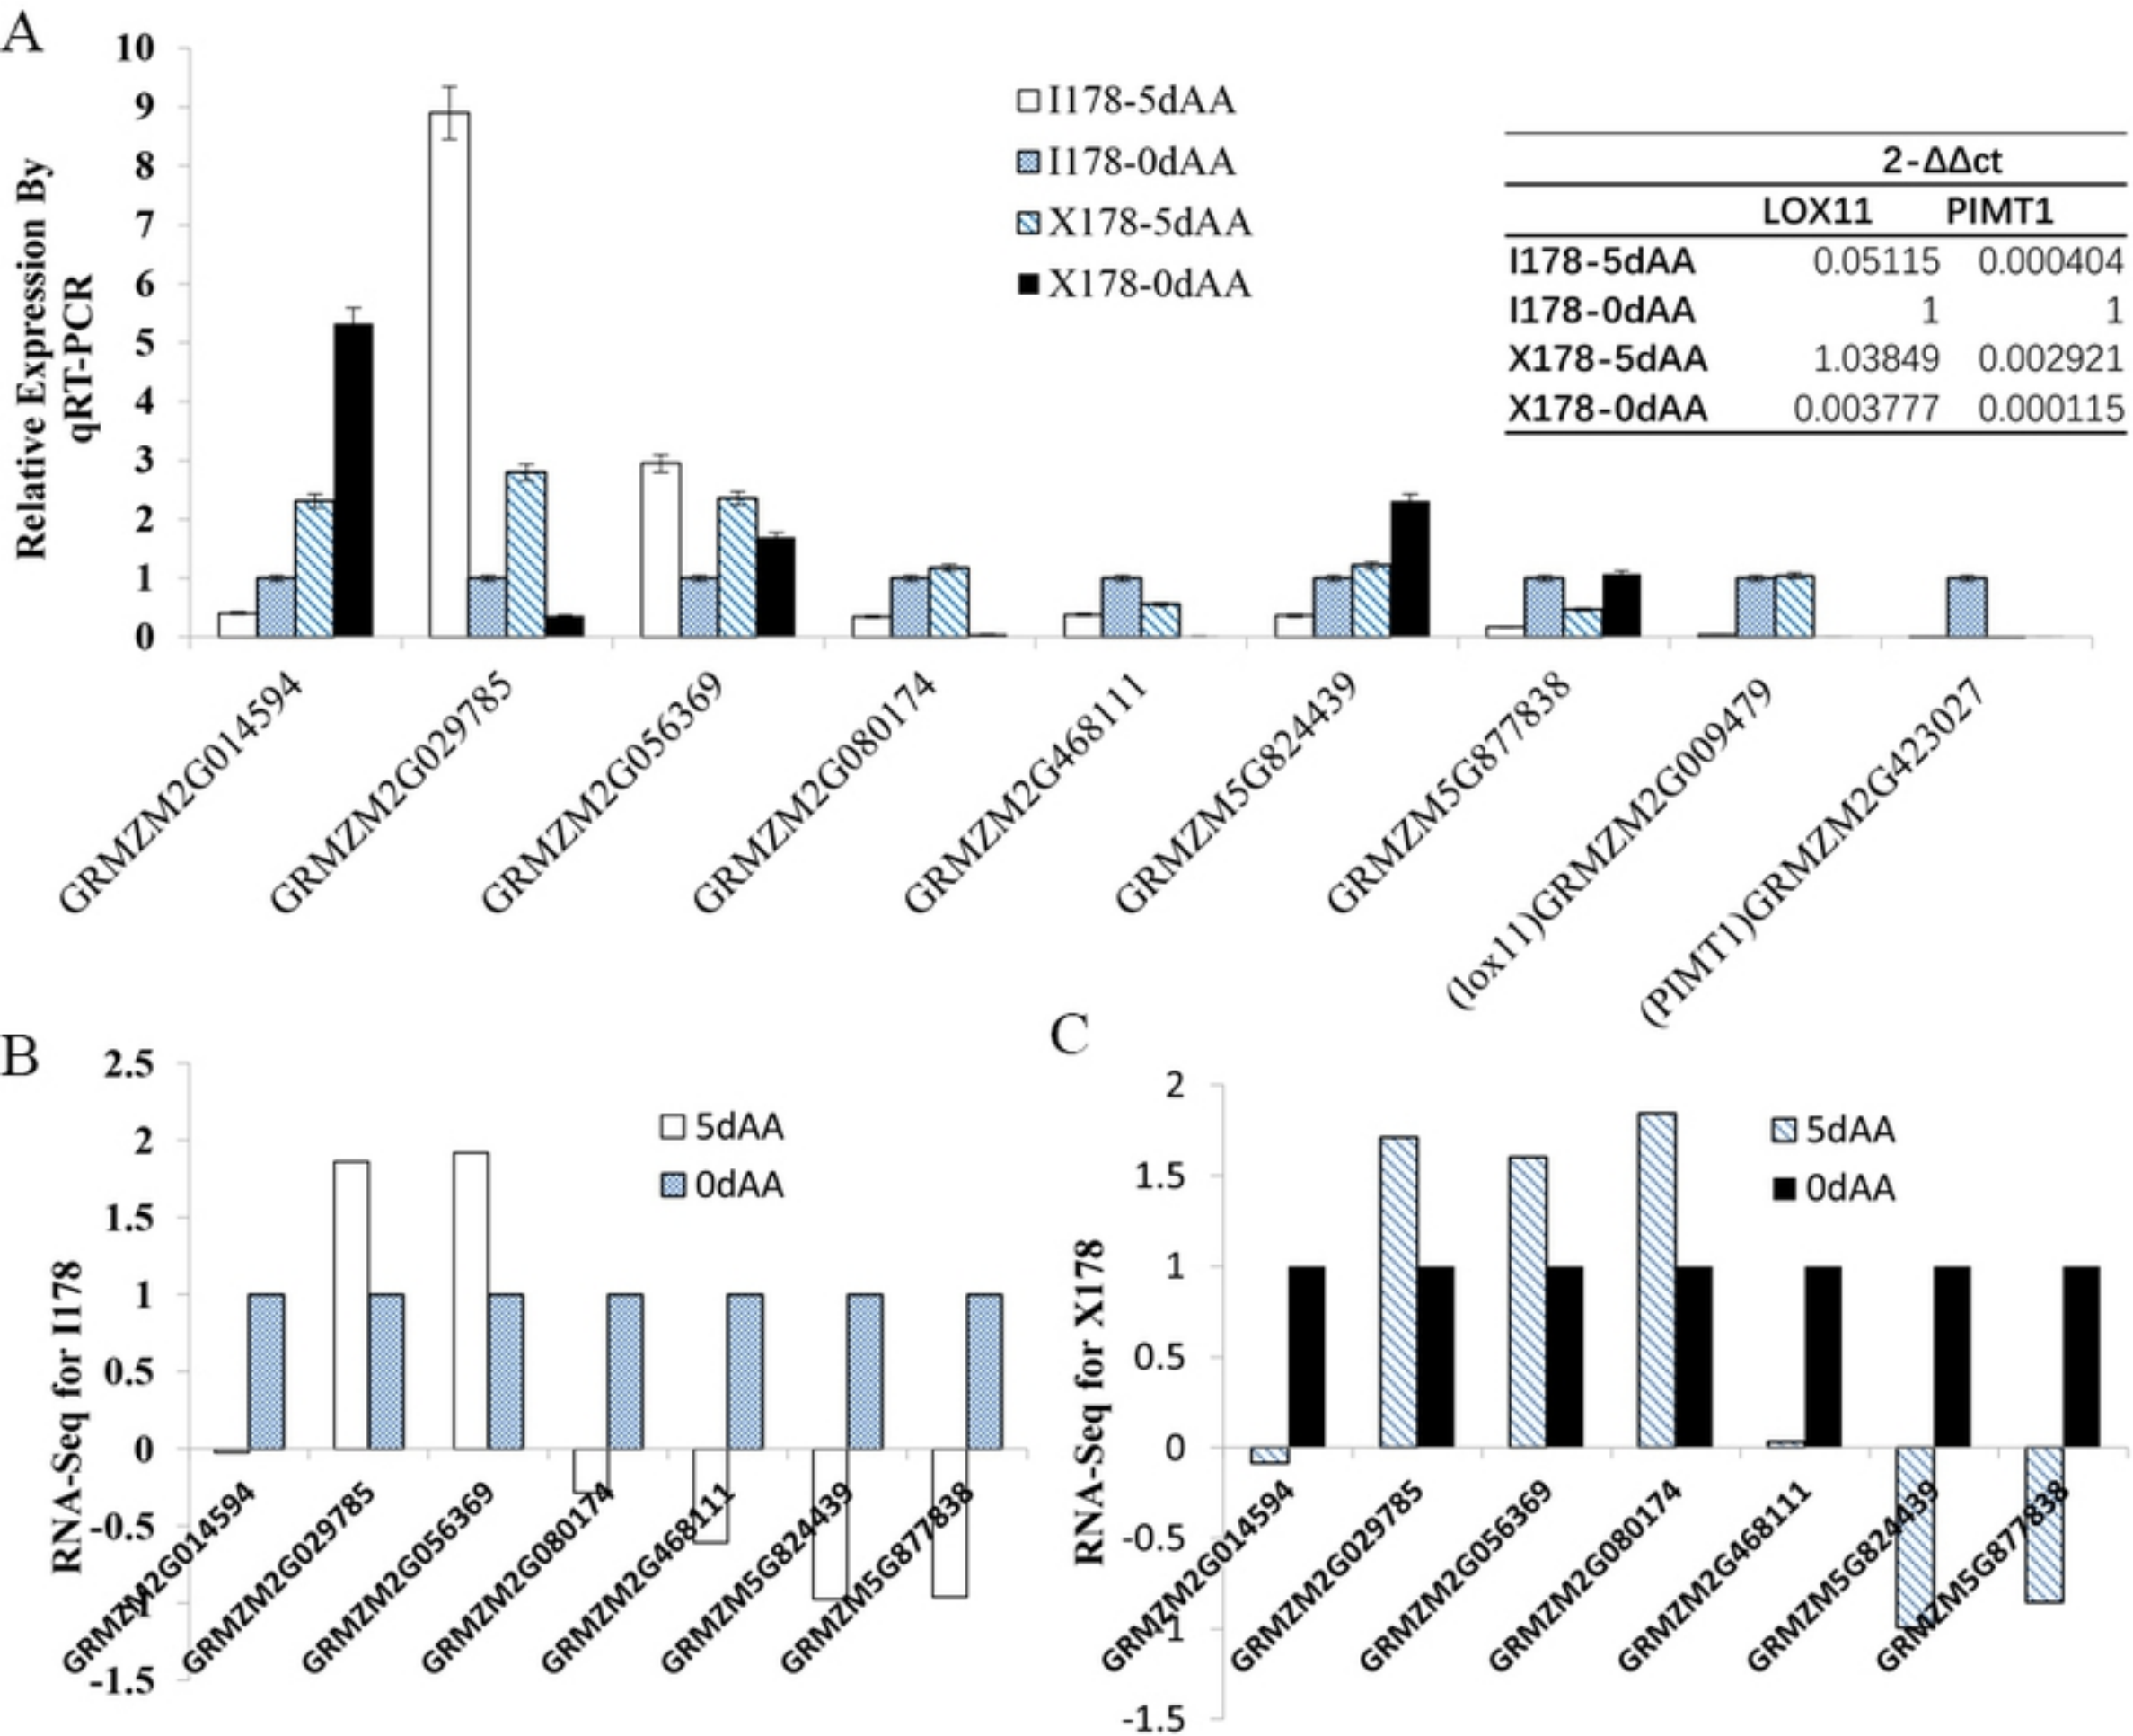

Fig 3



A

$-\log_{10}(P.value)$

Gene number ● 500 ● 1000 ● 1500

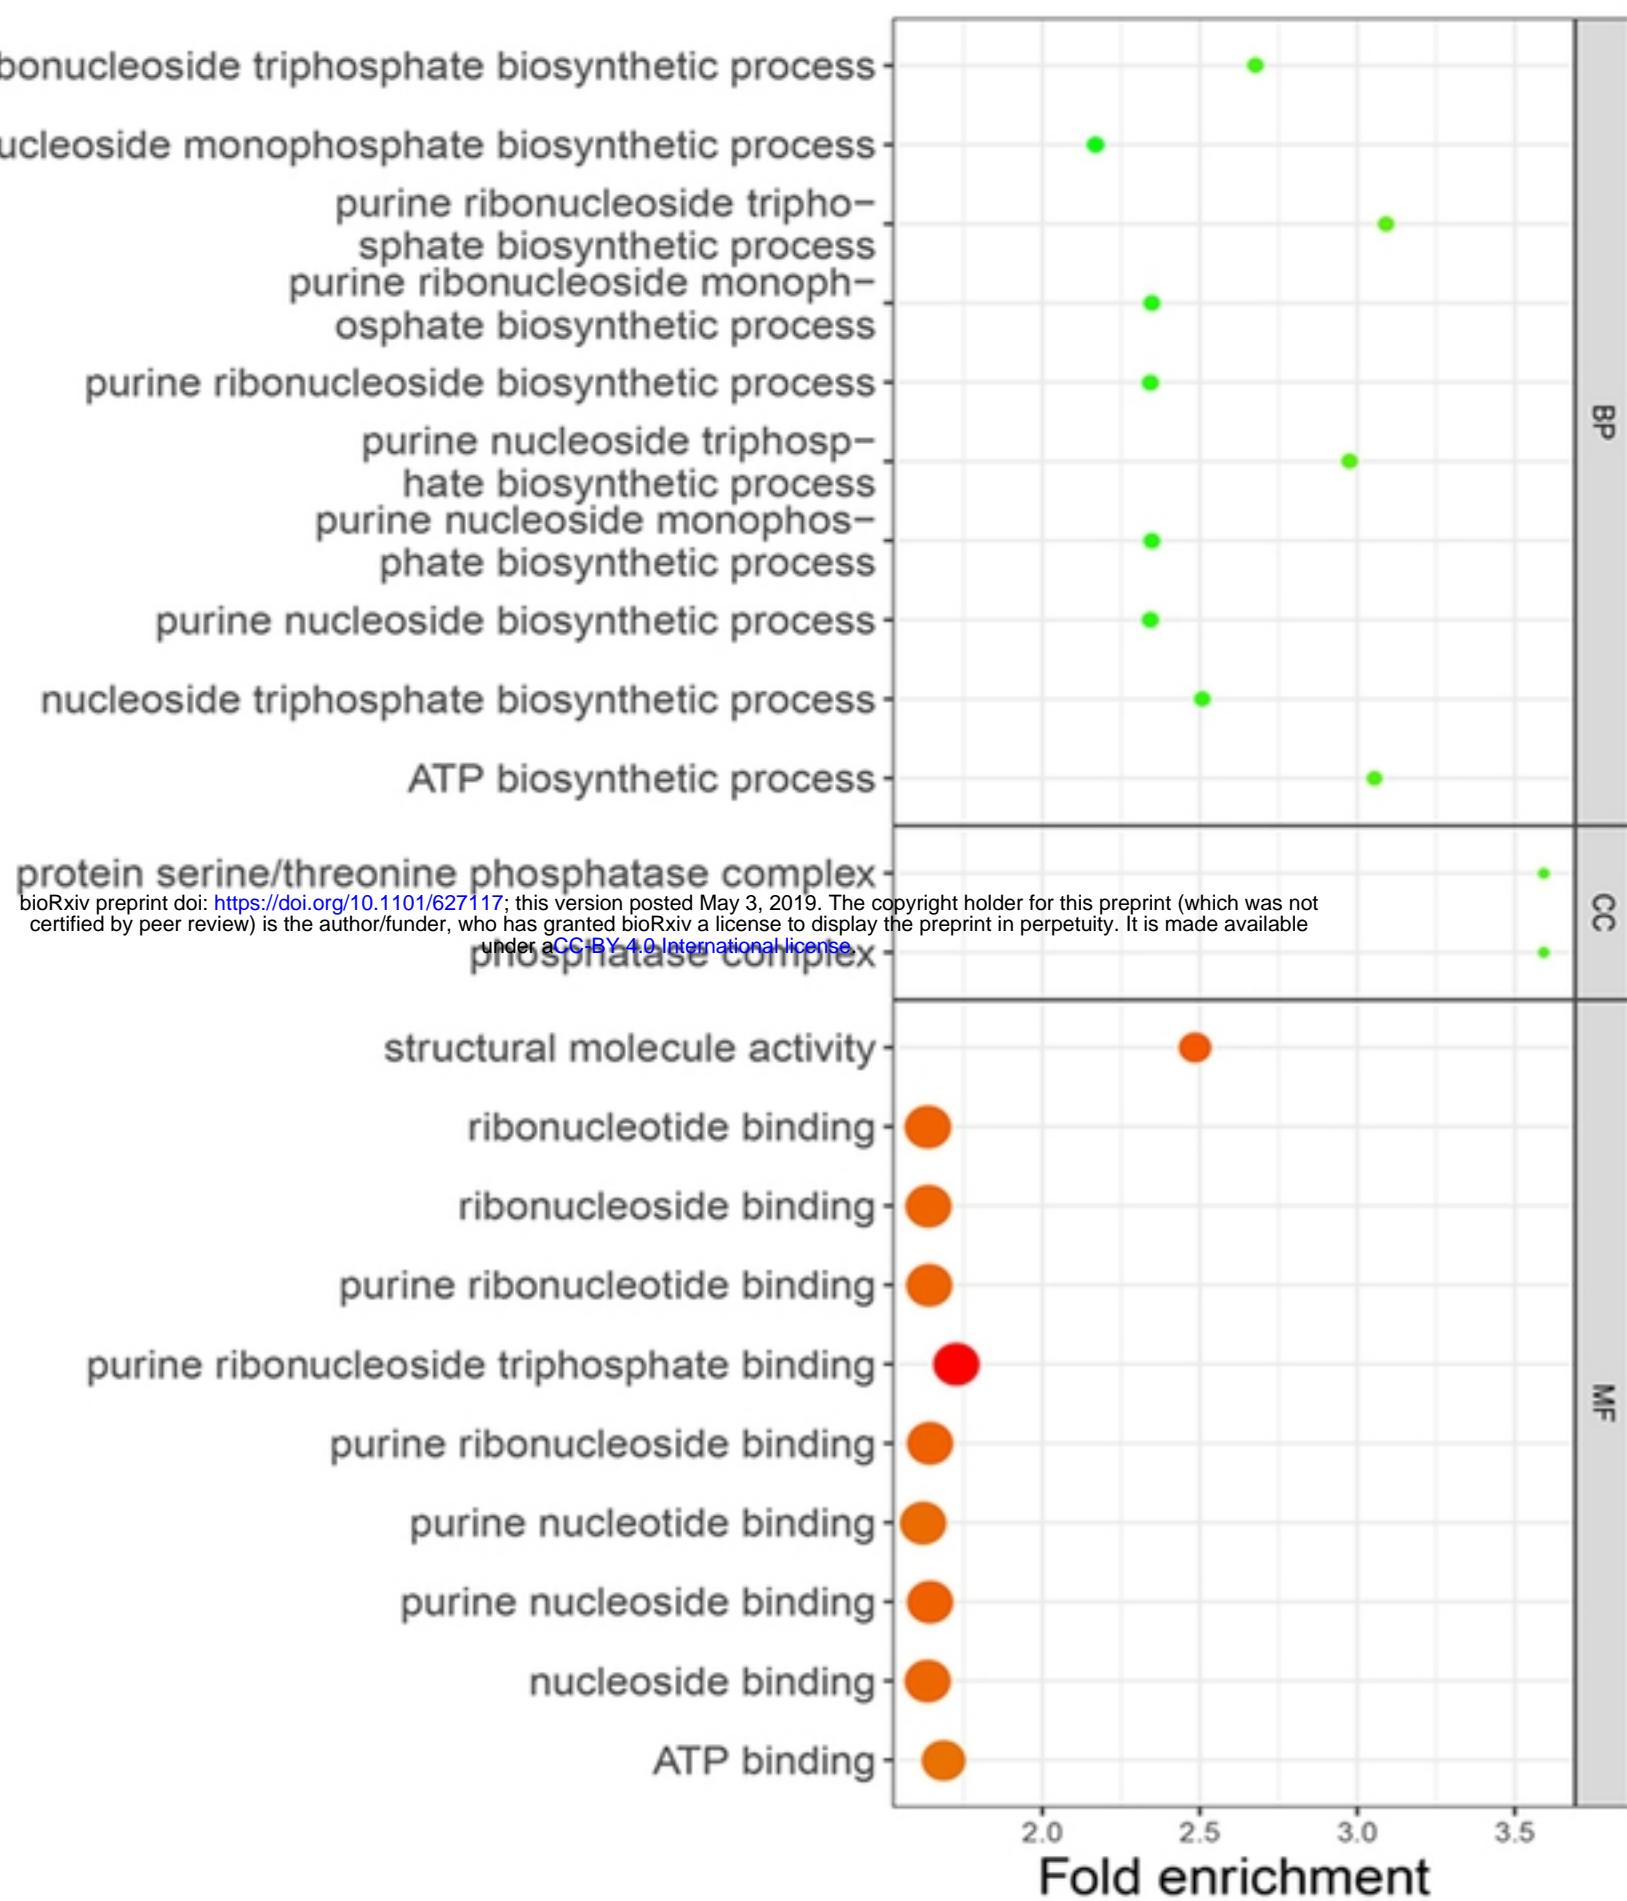

B

$-\log_{10}(P.value)$

Gene number ● 15 ● 20 ● 25 ● 30

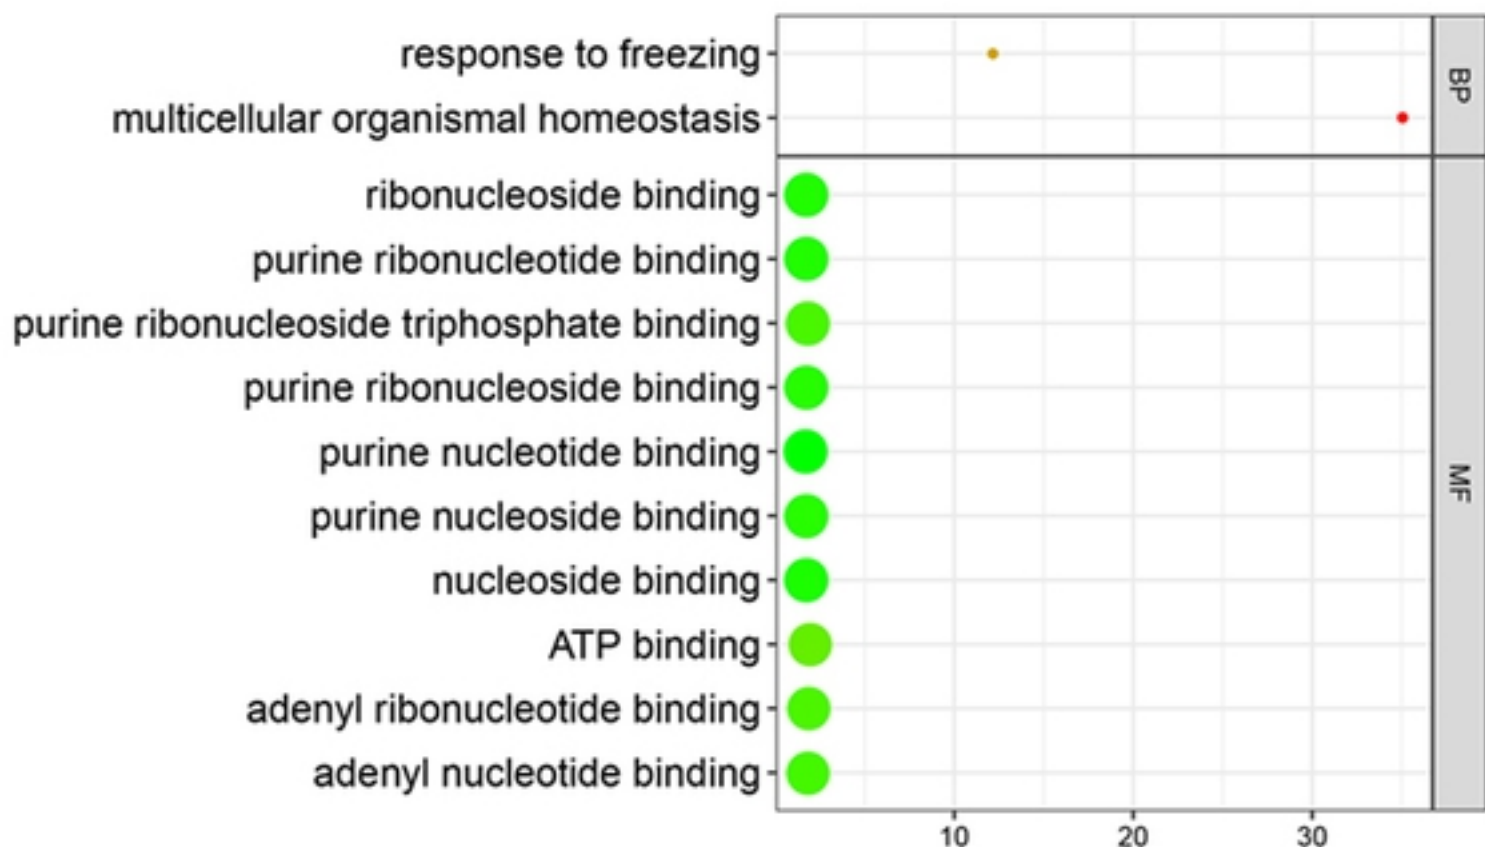

Fig 4
